# Supplementary material for: 9-Substituted acridines as effective corrosion inhibitors for mild steel: electrochemical, surface morphology, and computational studies
Source: Royal Society of Chemistry journal article supplement (doi:10.1039/d0nj00440e), 2020-01-01
Supplement: d0nj00440e1.pdf [file d0nj00440e1.pdf]

## Electronic Supplementary Information (ESI)

# **9-Substituted acridines as effective corrosion inhibitors for mild steel: Electrochemical, surface morphology and computational studies**

Weiwei Zhang,<sup>a</sup> Ying Liu,<sup>\*a</sup> Yinlin Zhang,<sup>a</sup> Li-Juan Wang,<sup>\*b</sup> Yan-Chao Wu<sup>ac</sup> and Hui-Jing Li<sup>\*ac</sup>

<sup>a</sup>*School of Marine Science and Technology, Harbin Institute of Technology, Weihai 264209, P. R. China.*

<sup>b</sup>*School of Materials Science and Engineering, Harbin Institute of Technology, Weihai 264209, P. R. China.*

<sup>c</sup>*Weihai Chuanghui Environmental Protection Technology Co., Ltd, Weihai 264200, P. R. China*

E-mails: liuying@iccas.ac.cn (Y. Liu), lijuanwanghit@163.com (L.-J. Wang), lihuijing@iccas.ac.cn (H.-J. Li).

## FIGURES

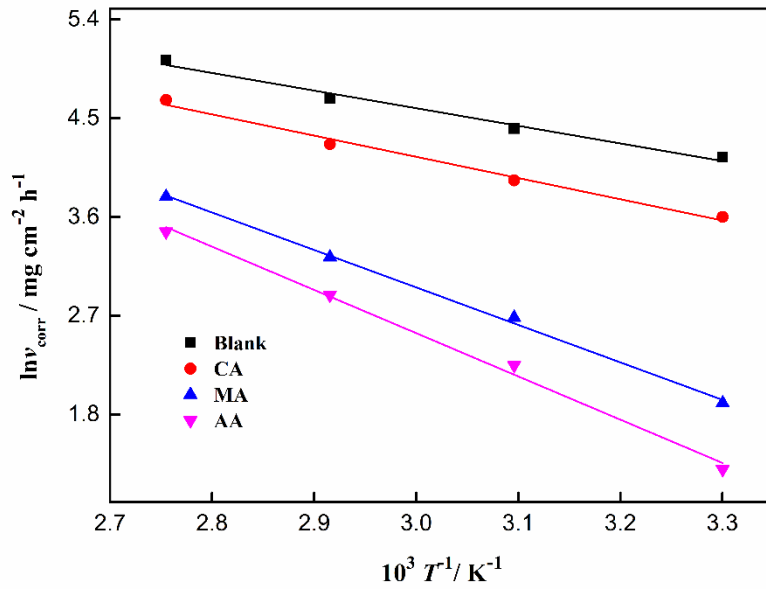

Fig. S1. Arrhenius plots of  $\ln v_{\text{corr}}$  vs.  $1/T$  for steel in 15% HCl in the absence and presence of inhibitors.

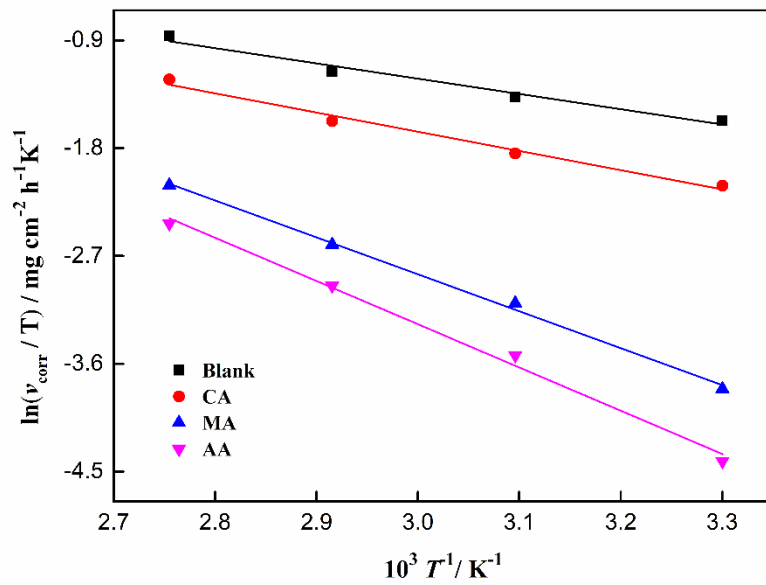

Fig. S2. Arrhenius plots of  $\ln(v_{\text{corr}}/T)$  vs.  $1/T$  for steel in 15% HCl in the absence and presence of inhibitors.

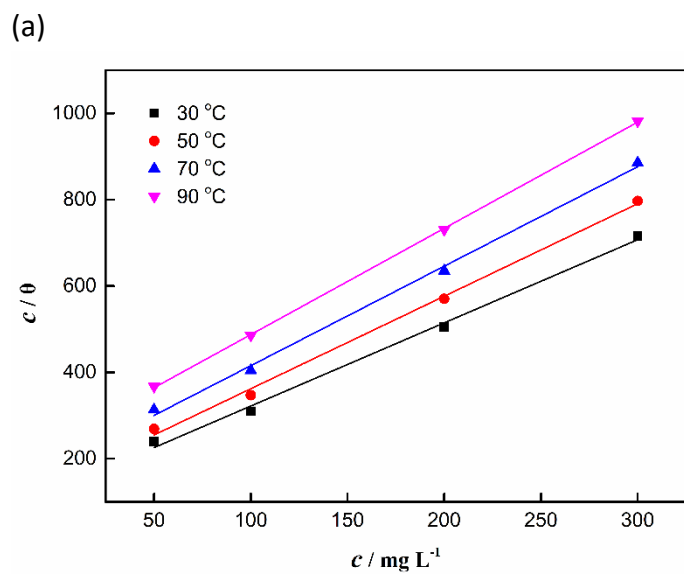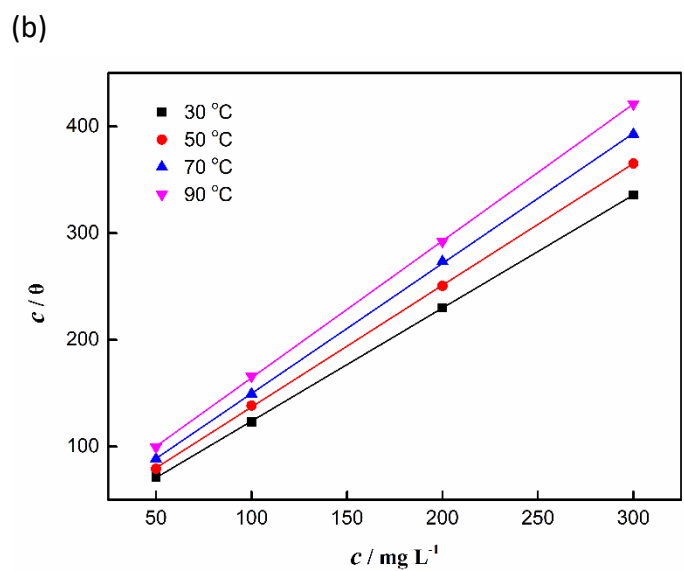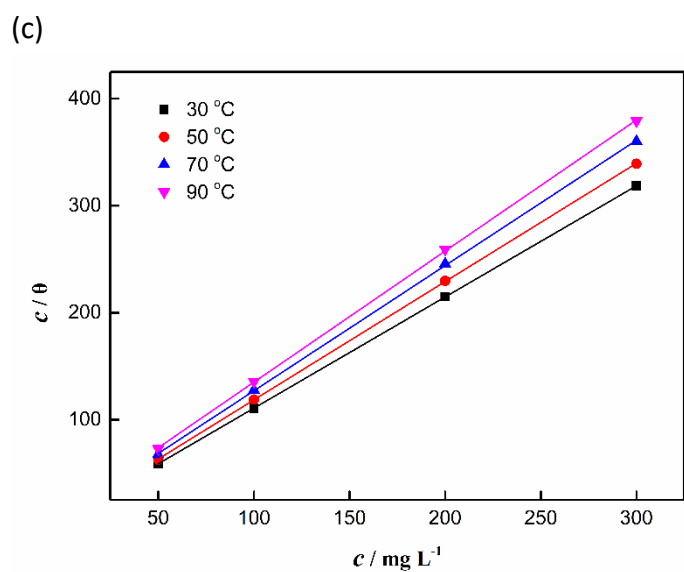

**Fig. S3.** Langmuir adsorption plots for mild steel in 15% HCl solution containing (a) CA, (b) MA and (c) AA at 30–90 °C.

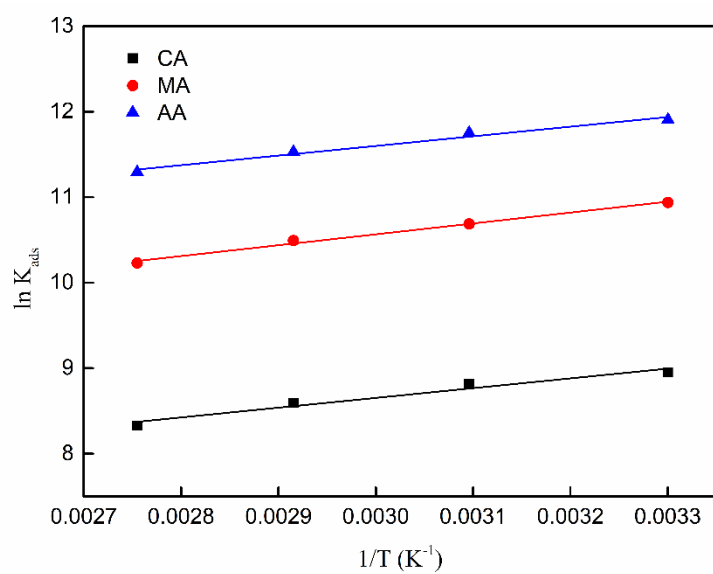

1

**Fig. S4.** Plot of  $\ln K_{\text{ads}}$  vs.  $1/T$  for mid steel in 15% HCl solution containing CA, MA and AA at 30–90 °C.

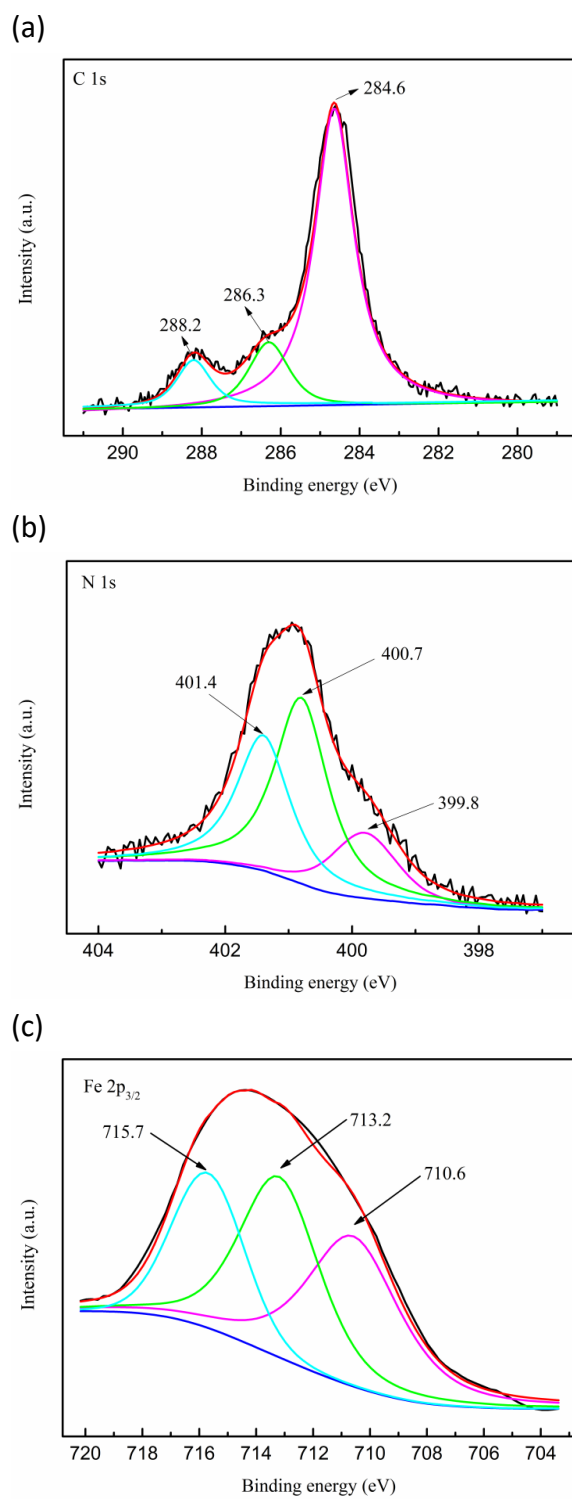

**Fig. S5.** High-resolution XPS spectra of (a) C 1s, (b) N 1s, and (c) Fe 2p<sub>3/2</sub> for AA treated mild steel.

## TABLES

**Table S1** Chemical composition of the steel grades.

| Steel | Chemical composition (wt.%)                                                                                                      |
|-------|----------------------------------------------------------------------------------------------------------------------------------|
| MS    | C (0.047), Mn (0.150), Si (0.190), P (0.028), S (0.008), Fe (balance)                                                            |
| J55   | C (0.241), Mn (1.103), Si (0.224), P (0.103), S (0.004), Ni (0.281), Mo (0.019), Fe (balance)                                    |
| X80   | C (0.066), Mn (1.582), Si (0.240), P (0.011), S (0.003), Cr (0.022), Nb (0.056), V (0.005), Ti (0.024), B (0.0006), Fe (balance) |

**Table S2** Calculated corrosion rate and inhibition efficiency for corrosion of MS, J55 and X80 in 15% HCl with inhibitors at 30 °C.

| Inhibitor/<br>C (ppm) | MS                                            |                 | J55                                           |                 | X80                                           |                 |       |
|-----------------------|-----------------------------------------------|-----------------|-----------------------------------------------|-----------------|-----------------------------------------------|-----------------|-------|
|                       | $v$ (mg<br>cm <sup>-2</sup> h <sup>-1</sup> ) | $\eta_w$<br>(%) | $v$ (mg<br>cm <sup>-2</sup> h <sup>-1</sup> ) | $\eta_w$<br>(%) | $v$ (mg<br>cm <sup>-2</sup> h <sup>-1</sup> ) | $\eta_w$<br>(%) |       |
|                       | Blank                                         | 0.0             | 63.05                                         | -               | 94.58                                         | 78.81           |       |
| CA                    | 50                                            | 49.88           | 20.89                                         | 77.98           | 17.55                                         | 63.83           | 19.01 |
|                       | 100                                           | 42.70           | 32.27                                         | 69.10           | 26.94                                         | 55.92           | 29.04 |
|                       | 200                                           | 38.11           | 39.56                                         | 63.53           | 32.83                                         | 51.06           | 35.21 |
|                       | 300                                           | 36.61           | 41.93                                         | 61.86           | 34.59                                         | 49.74           | 36.89 |
| MA                    | 50                                            | 18.77           | 70.23                                         | 38.79           | 58.99                                         | 28.44           | 63.91 |
|                       | 100                                           | 11.82           | 81.25                                         | 30.42           | 67.84                                         | 21.18           | 73.13 |
|                       | 200                                           | 8.21            | 86.98                                         | 26.30           | 72.19                                         | 17.80           | 77.41 |
|                       | 300                                           | 6.71            | 89.36                                         | 23.91           | 74.72                                         | 15.26           | 80.64 |
| AA                    | 50                                            | 9.49            | 84.95                                         | 31.82           | 66.36                                         | 21.03           | 73.32 |
|                       | 100                                           | 5.96            | 90.54                                         | 24.96           | 73.61                                         | 16.16           | 79.49 |
|                       | 200                                           | 4.40            | 93.02                                         | 21.51           | 77.26                                         | 13.57           | 82.78 |
|                       | 300                                           | 3.67            | 94.18                                         | 19.11           | 79.79                                         | 12.24           | 84.47 |

**Table S3** Polarization curve parameters for the corrosion of mild steel in 15% HCl solution without and with different concentrations of inhibitors.

| Inhibitors | <i>c</i> (mg/L) | <i>E</i> <sub>corr</sub> (mV vs.SCE) | <i>i</i> <sub>corr</sub> (μA cm <sup>-2</sup> ) | <i>β</i> <sub>a</sub> (mV dec <sup>-1</sup> ) | - <i>β</i> <sub>c</sub> (mV dec <sup>-1</sup> ) | <i>η</i> (%) |
|------------|-----------------|--------------------------------------|-------------------------------------------------|-----------------------------------------------|-------------------------------------------------|--------------|
| -          | Blank           | -457                                 | 1595                                            | 103.2                                         | 136.4                                           | -            |
| CA         | 50              | -463                                 | 1207                                            | 112.7                                         | 148.6                                           | 24.3         |
|            | 100             | -470                                 | 1007.2                                          | 101.1                                         | 130.7                                           | 36.85        |
|            | 200             | -468                                 | 935.2                                           | 102.3                                         | 134.1                                           | 41.37        |
|            | 300             | -473                                 | 882.0                                           | 106.8                                         | 140.9                                           | 44.70        |
|            | 50              | -471                                 | 472.9                                           | 101.0                                         | 118.9                                           | 70.35        |
| MA         | 100             | -476                                 | 287.4                                           | 89.5                                          | 126.0                                           | 81.98        |
|            | 200             | -480                                 | 163.0                                           | 82.5                                          | 120.8                                           | 89.78        |
|            | 300             | -484                                 | 128.1                                           | 85.4                                          | 127.7                                           | 91.97        |
|            | 50              | -476                                 | 243.4                                           | 86.1                                          | 124.9                                           | 84.74        |
| AA         | 100             | -480                                 | 151.2                                           | 84.8                                          | 128.7                                           | 90.52        |
|            | 200             | -483                                 | 106.0                                           | 88.6                                          | 130.5                                           | 93.35        |
|            | 300             | -486                                 | 76.6                                            | 89.4                                          | 137.6                                           | 95.20        |

**Table S4** EIS parameters for the corrosion of mild steel in 15% HCl solution without and with different concentrations of inhibitors.

| Inhibitors | <i>c</i> (mg/L) | <i>R</i> <sub>f</sub> (Ω cm <sup>2</sup> ) | <i>R</i> <sub>ct</sub> (Ω cm <sup>2</sup> ) | <i>C</i> <sub>f</sub> (n <sub>1</sub> ) (μF cm <sup>-2</sup> ) | <i>C</i> <sub>d</sub> (n <sub>2</sub> ) (μF cm <sup>-2</sup> ) | <i>R</i> <sub>p</sub> (Ω cm <sup>2</sup> ) | <i>χ</i> <sup>2</sup> (10 <sup>-3</sup> ) | <i>η</i> <sub>z</sub> (%) |
|------------|-----------------|--------------------------------------------|---------------------------------------------|----------------------------------------------------------------|----------------------------------------------------------------|--------------------------------------------|-------------------------------------------|---------------------------|
| -          | Blank           | -                                          | 41.8                                        | -                                                              | 738.1 (0.86)                                                   | 41.8                                       | 3.05                                      | -                         |
| CA         | 50              | -                                          | 53.9                                        | -                                                              | 371.4 (0.82)                                                   | 53.9                                       | 8.41                                      | 22.45                     |
|            | 100             | -                                          | 67.2                                        | -                                                              | 278.1 (0.83)                                                   | 67.2                                       | 6.21                                      | 37.80                     |
|            | 200             | -                                          | 73.7                                        | -                                                              | 243.4 (0.86)                                                   | 73.7                                       | 8.85                                      | 43.28                     |
|            | 300             | -                                          | 77.2                                        | -                                                              | 213.4 (0.86)                                                   | 77.2                                       | 7.11                                      | 45.85                     |
|            | 50              | 9.2                                        | 139.8                                       | 47.5 (1)                                                       | 163.5 (0.71)                                                   | 149.0                                      | 1.53                                      | 71.95                     |
| MA         | 100             | 13.6                                       | 234.9                                       | 36.8 (1)                                                       | 118.5 (0.72)                                                   | 248.5                                      | 1.77                                      | 83.18                     |
|            | 200             | 28.9                                       | 401.8                                       | 27.8 (1)                                                       | 79.7 (0.69)                                                    | 430.7                                      | 3.92                                      | 90.29                     |
|            | 300             | 34.2                                       | 498.9                                       | 23.9 (1)                                                       | 63.6 (0.68)                                                    | 533.1                                      | 1.65                                      | 92.16                     |
|            | 50              | 4.6                                        | 306.1                                       | 34.4 (1)                                                       | 99.6 (0.72)                                                    | 310.7                                      | 4.66                                      | 86.55                     |
| AA         | 100             | 10.0                                       | 484.3                                       | 25.8 (1)                                                       | 72.6 (0.69)                                                    | 494.3                                      | 6.74                                      | 91.54                     |
|            | 200             | 30.4                                       | 646.8                                       | 20.6 (1)                                                       | 47.7 (0.70)                                                    | 677.2                                      | 8.63                                      | 93.83                     |
|            | 300             | 26.8                                       | 909.4                                       | 16.2 (1)                                                       | 45.9 (0.68)                                                    | 936.2                                      | 2.16                                      | 95.54                     |

**Table S5** Weight loss results of mild steel in 15% HCl with inhibitors at different temperatures.

| Inhibitor/<br><i>C</i> (ppm) | 30 °C                                              |                 | 50 °C                                              |                 | 70 °C                                              |                 | 90 °C                                              |                 |       |
|------------------------------|----------------------------------------------------|-----------------|----------------------------------------------------|-----------------|----------------------------------------------------|-----------------|----------------------------------------------------|-----------------|-------|
|                              | <i>v</i> (mg<br>cm <sup>-2</sup> h <sup>-1</sup> ) | $\eta_w$<br>(%) | <i>v</i> (mg<br>cm <sup>-2</sup> h <sup>-1</sup> ) | $\eta_w$<br>(%) | <i>v</i> (mg<br>cm <sup>-2</sup> h <sup>-1</sup> ) | $\eta_w$<br>(%) | <i>v</i> (mg<br>cm <sup>-2</sup> h <sup>-1</sup> ) | $\eta_w$<br>(%) |       |
| Blank                        | 0.0                                                | 63.05           | -                                                  | 81.86           | -                                                  | 107.57          | -                                                  | 153.15          | -     |
| CA                           | 50                                                 | 49.88           | 20.89                                              | 66.66           | 18.57                                              | 90.42           | 15.94                                              | 132.31          | 13.61 |
|                              | 100                                                | 42.70           | 32.27                                              | 58.29           | 28.79                                              | 80.98           | 24.72                                              | 121.62          | 20.59 |
|                              | 200                                                | 38.11           | 39.56                                              | 53.18           | 35.04                                              | 73.71           | 31.48                                              | 111.23          | 27.37 |
|                              | 300                                                | 36.61           | 41.93                                              | 51.06           | 37.63                                              | 71.11           | 33.89                                              | 106.36          | 30.55 |
| MA                           | 50                                                 | 18.77           | 70.23                                              | 30.09           | 63.24                                              | 46.67           | 56.61                                              | 76.01           | 50.37 |
|                              | 100                                                | 11.82           | 81.25                                              | 22.67           | 72.31                                              | 35.51           | 66.99                                              | 60.77           | 60.32 |
|                              | 200                                                | 8.21            | 86.98                                              | 16.51           | 79.83                                              | 28.85           | 73.18                                              | 48.29           | 68.47 |
|                              | 300                                                | 6.71            | 89.36                                              | 14.63           | 82.13                                              | 25.35           | 76.43                                              | 44.03           | 71.25 |
| AA                           | 50                                                 | 9.49            | 84.95                                              | 16.49           | 79.85                                              | 27.69           | 74.26                                              | 47.95           | 68.69 |
|                              | 100                                                | 5.96            | 90.54                                              | 13.01           | 84.11                                              | 23.26           | 78.38                                              | 40.13           | 73.80 |
|                              | 200                                                | 4.40            | 93.02                                              | 10.61           | 87.04                                              | 19.96           | 81.44                                              | 34.99           | 77.15 |
|                              | 300                                                | 3.67            | 94.18                                              | 9.47            | 88.43                                              | 17.97           | 83.29                                              | 31.98           | 79.12 |

**Table S6** Thermodynamic parameters of inhibitors on the mild steel surface in 15% HCl solution.

| Compounds | <i>T</i> (°C) | <i>R</i> <sup>2</sup> | <i>K</i> <sub>ads</sub> (10 <sup>3</sup> ) | $\Delta G^0_{ads}$ (kJ mol <sup>-1</sup> ) | $\Delta H^0_{ads}$ (kJ<br>mol <sup>-1</sup> ) | $\Delta S^0_{ads}$ (J mol <sup>-1</sup> ) |
|-----------|---------------|-----------------------|--------------------------------------------|--------------------------------------------|-----------------------------------------------|-------------------------------------------|
| CA        | 30            | 0.9947                | 7.72                                       | -22.55                                     | -9.48                                         | 158.38                                    |
|           | 50            | 0.9956                | 6.76                                       | -23.68                                     |                                               |                                           |
|           | 70            | 0.9963                | 5.40                                       | -24.51                                     |                                               |                                           |
|           | 90            | 0.9947                | 4.14                                       | -25.14                                     |                                               |                                           |
| MA        | 30            | 0.9999                | 56.32                                      | -27.56                                     | -10.57                                        | 171.01                                    |
|           | 50            | 0.9999                | 43.77                                      | -28.70                                     |                                               |                                           |
|           | 70            | 0.9998                | 36.03                                      | -29.92                                     |                                               |                                           |
|           | 90            | 0.9999                | 27.76                                      | -30.88                                     |                                               |                                           |
| AA        | 30            | 0.9999                | 147.73                                     | -29.99                                     | -9.35                                         | 183.23                                    |
|           | 50            | 0.9999                | 126.76                                     | -31.55                                     |                                               |                                           |
|           | 70            | 0.9998                | 101.44                                     | -32.87                                     |                                               |                                           |
|           | 90            | 0.9998                | 80.06                                      | -34.07                                     |                                               |                                           |
